# Supplementary material for: ACTH treatment promotes murine cardiac allograft acceptance
Source: PubMed Central journal article supplement (PMC8410061; doi:10.1172/jci.insight.143385), 2021-07-08
Supplement: jciinsight-6-143385-s052.pdf [file jciinsight-6-143385-s052.pdf]

1                   **ACTH treatment promotes murine cardiac allograft acceptance**

2

3   Jing Zhao<sup>1,2†</sup>, Liwei Jiang<sup>1,2†</sup>, Mayuko Uehara<sup>1,2</sup>, Naima Banouni<sup>1,2</sup>, Basmah S Al Dulaijan<sup>1,2</sup>,  
4   Jamil Azzi<sup>1,2</sup>, Takaharu Ichimura<sup>2</sup>, Xiaofei Li<sup>1,2</sup>, Petr Jarolim<sup>3</sup>, Paolo Fiorina<sup>4</sup>, Stefan G.Tullius<sup>5</sup>,  
5   Joren C. Madsen<sup>6,7</sup>, Vivek Kasinath<sup>1,2‡</sup>, Reza Abdi<sup>1,2‡</sup>

6

7   <sup>1</sup>Transplantation Research Center, Brigham and Women’s Hospital, Harvard Medical School,  
8   Boston, MA 02115, USA

9   <sup>2</sup>Renal Division, Brigham and Women’s Hospital, Harvard Medical School, Boston, MA 02115,  
10   USA

11   <sup>3</sup>Department of Pathology, Brigham and Women’s Hospital, Harvard Medical School, Boston,  
12   MA 02115, USA

13   <sup>4</sup>Department of Nephrology, Boston Children’s Hospital, Harvard Medical School, Boston, MA  
14   02115, USA

15   <sup>5</sup>Division of Transplant Surgery, Department of Surgery, Brigham and Women’s Hospital,  
16   Harvard Medical School, Boston, MA, 02115, USA

17   <sup>6</sup>Center for Transplantation Sciences, Department of Surgery, Massachusetts General Hospital  
18   and Harvard Medical School, Boston, MA, 02114USA

19   <sup>7</sup>Division of Cardiac Surgery, Department of Surgery, Massachusetts General Hospital and  
20   Harvard Medical School, Boston, MA, 02114, USA

21

22   **Correspondence:**

23   Reza Abdi, MD

24 Transplantation Research Center, Brigham and Women's Hospital, 221 Longwood Ave, Boston

25 MA 02115, USA

26 Tel: 617-732-5259, Fax: 617-732-5254, Email: [rabdi@rics.bwh.harvard.edu](mailto:rabdi@rics.bwh.harvard.edu)

27 † Co-first authors; ‡ co-senior authors

28

29 **Conflict-of-interest:** The authors have declared that no conflict of interest exists.

30 Supplemental Figures and Figure Legends:

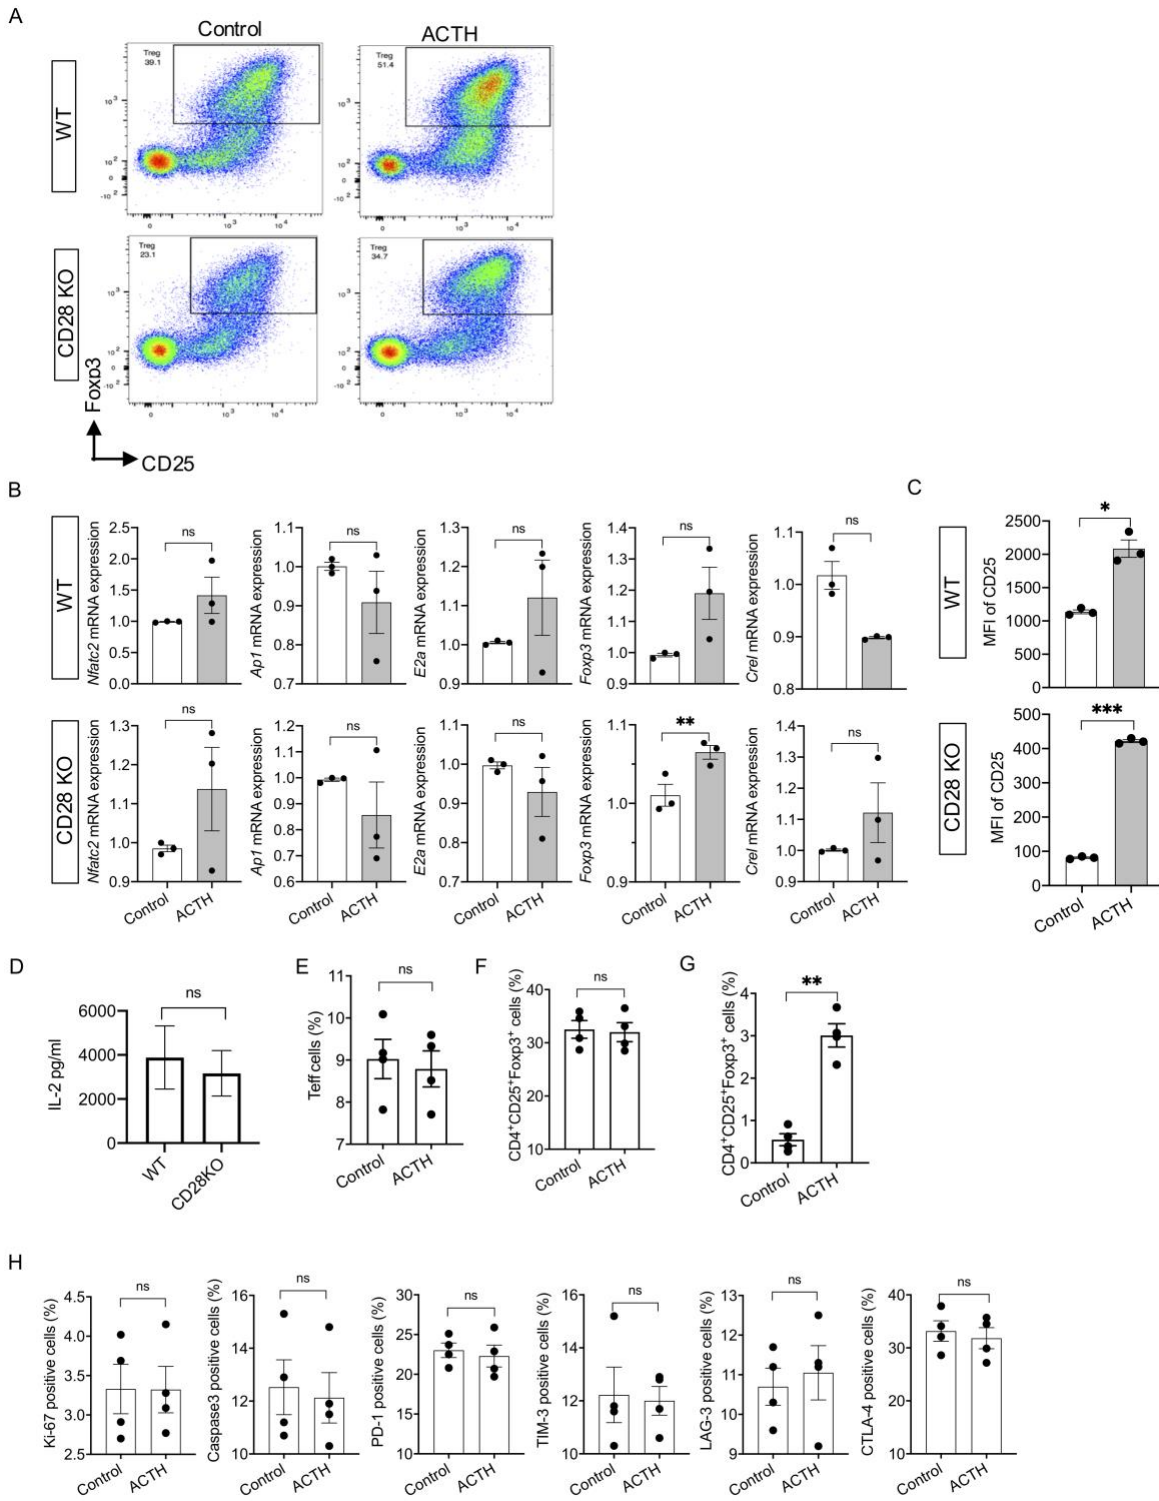

31

32 Supplemental Figure 1. (A) Representative flow cytometry plots of CD4<sup>+</sup>CD25<sup>+</sup>Foxp3<sup>+</sup> Treg

33 populations from Treg assay in untreated control and ACTH-treated groups, using lymphocytes  
34 from Wild-type (WT) and CD28 knock-out (CD28KO) C57BL/6 background mice. (B) qPCR of  
35 Tregs shows significantly increased *Foxp3* gene expression in ACTH-treated group compared to  
36 untreated control group from CD28KO mice, but no significant difference is seen with WT mice.  
37 No significant difference in gene expression levels of *Nfatc2*, *Apl1*, *E2a*, and *Cre1* between  
38 untreated control and ACTH-treated group from WT and CD28KO mice was seen. (C) Flow  
39 cytometric analysis reveals that ACTH induced a higher CD25 expression (by mean fluorescence  
40 intensity (MFI)) than no treatment (control) in a Treg induction assay, using splenocytes from WT  
41 and CD28KO mice. Experiments were performed independently in triplicate. (D) Luminex assay  
42 revealed no significant difference in IL-2 concentration between WT and CD28KO mice following  
43 ACTH treatment. (E) Flow cytometric analysis of T cells from WT spleen shows no difference of  
44 percentage in Teff cells following either treatment with ACTH or no treatment (Control). (F) Flow  
45 cytometric analysis of T cells collected from WT spleen shows no significant difference in the  
46 percentages of nature Tregs (nTregs) between the ACTH-treated group and the untreated control  
47 group. (G) Flow cytometric analysis of T cells collected from WT spleen shows significantly  
48 higher percentage of induced Tregs (iTregs) in ACTH-treated group than untreated control group.  
49 (H) Flow cytometric analysis of Tregs collected from WT spleen shows no significant difference  
50 in the percentages of Ki-67, Caspase 3, PD-1, TIM-3, LAG-3 and CTLA-4 between the ACTH-  
51 treated group and untreated control group. Data presented as the mean  $\pm$  SEM, \* $p < 0.05$ , \*\*  $p < 0.01$ ,  
52 \*\*\*  $p < 0.001$ .

53

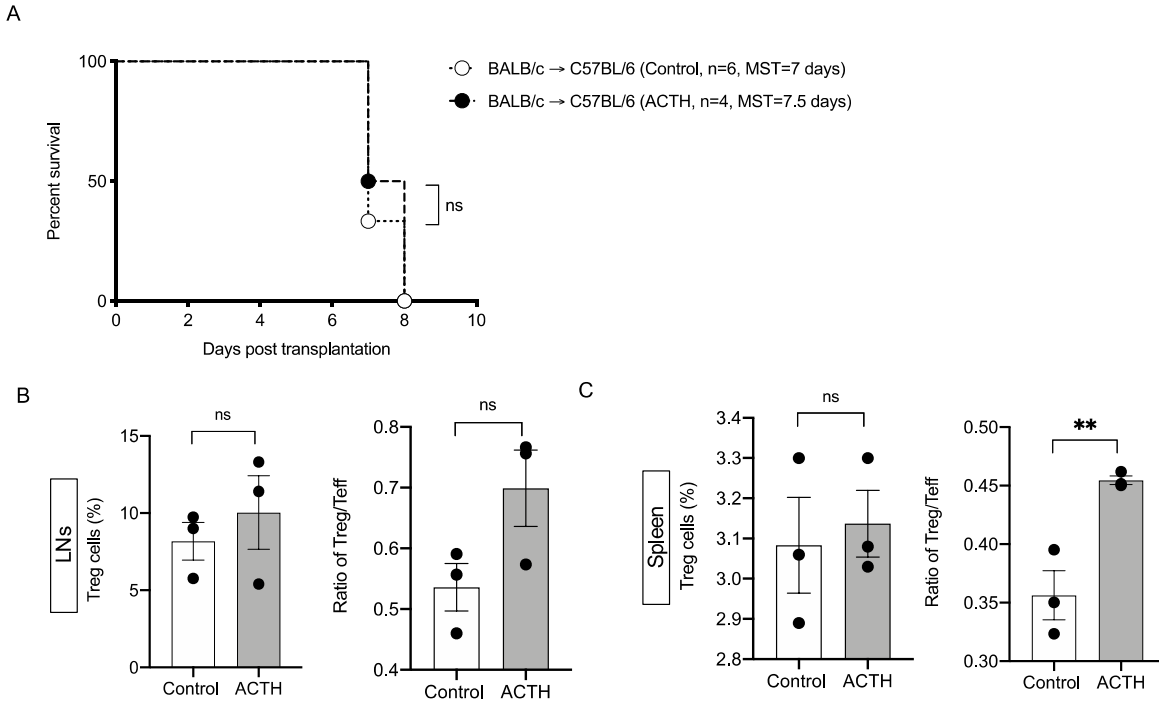

54

55 Supplemental Figure 2. (A) Survival curve demonstrates no significant difference in heart allograft  
 56 survival between C57BL/6 recipients of BALB/c hearts that received ACTH (n=4 mice/group,  
 57 MST=7.5 days) versus untreated allograft recipients (control; n= 6 mice/group, MST=7 days). (B)  
 58 Flow cytometric analysis of LNs collected from CD28KO recipients at Day 7 shows no difference  
 59 in percentages of Tregs and Treg/Teff ratio (CD4<sup>+</sup>CD25<sup>+</sup>Foxp3<sup>+</sup>/ CD44<sup>+</sup>CD62L<sup>-</sup>) between the  
 60 ACTH-treated group and untreated control group. (C) Flow cytometric analysis of spleens  
 61 collected from CD28KO recipients at day 7 shows no significant difference in Tregs but  
 62 significantly higher Treg/Teff ratio in the ACTH-treated group than the untreated control group.  
 63 (n=3 mice/group) Data presented as the mean ± SEM, \*\* p<0.01.

64

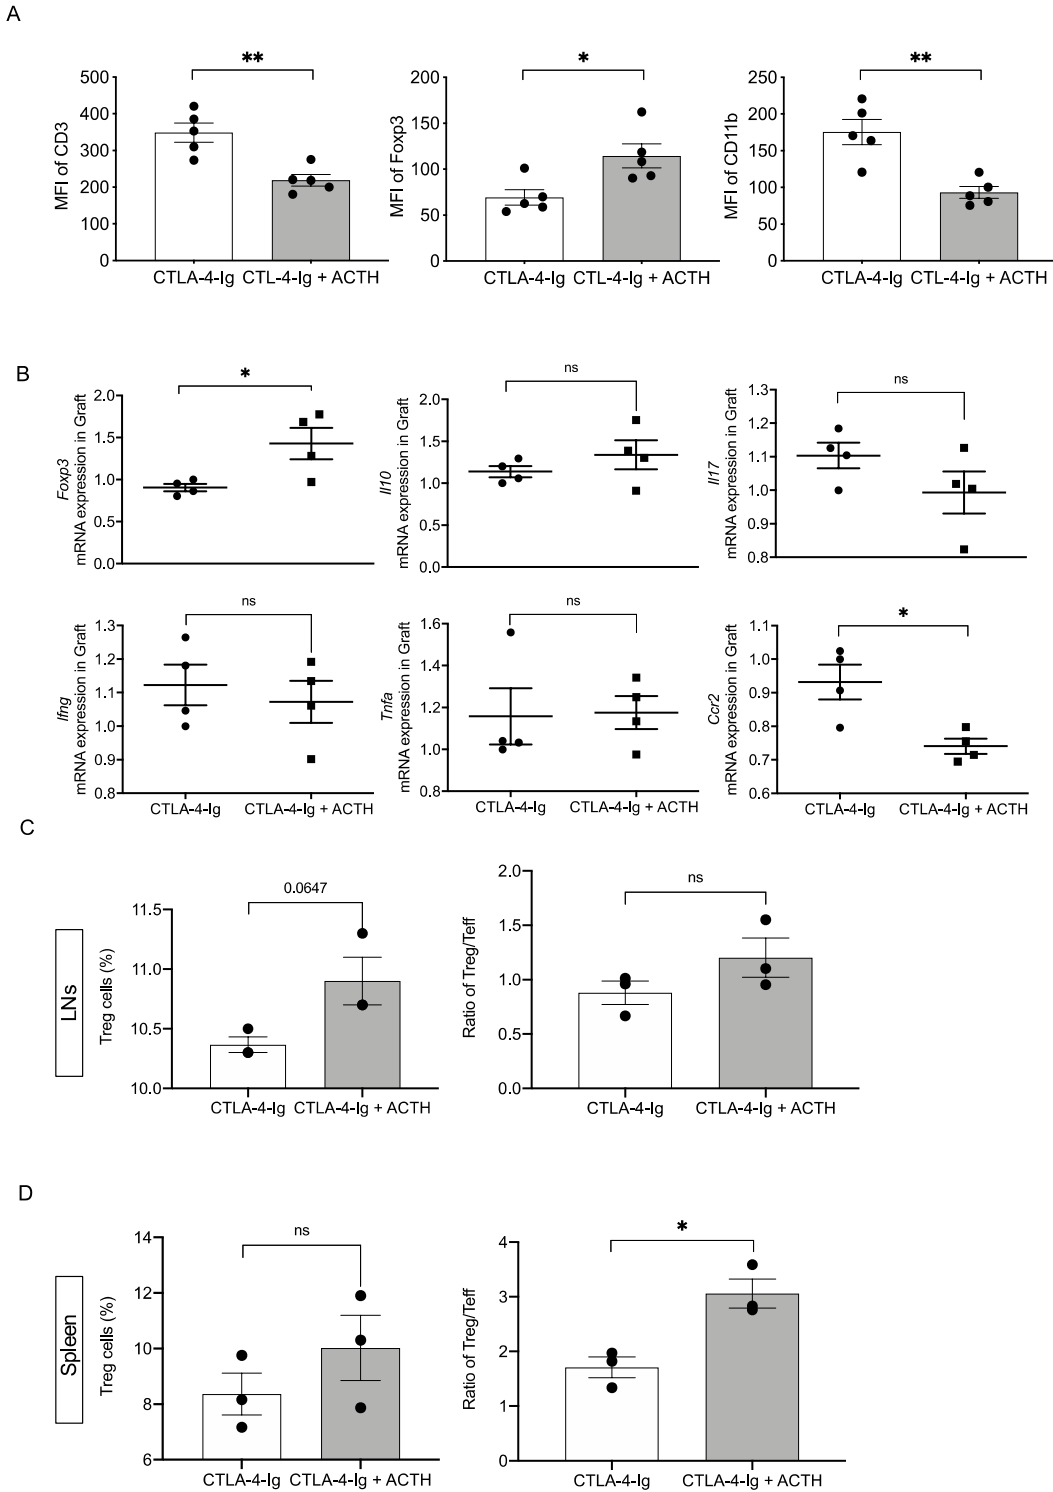

65

66 Supplemental Figure 3. (A) Semi-quantitative analysis by MFI of fluorescence micrographs of heart  
 67 allograft sections revealed fewer CD3<sup>+</sup> T cells and CD11b<sup>+</sup> cells, but more Foxp3<sup>+</sup> Tregs in group  
 68 treated with CTLA-4-Ig + ACTH in comparison to group treated with CTLA-4-Ig alone (n=3

69 allograft/group) (B) qPCR of heart allografts showed significantly higher expression of *Foxp3* and  
 70 *Ccr2* genes in CTLA-4-Ig + ACTH group, as compared to group treated with CTLA-4-Ig alone.  
 71 No significant difference in gene expression of *Il10*, *Ifng*, *Tnfa* and *Il17* was observed (n=4  
 72 mice/group). (C) Flow cytometric analysis of LNs collected from C57BL/6 recipients at Day 28  
 73 showed no difference in the percentages of Tregs and the Treg/Teff ratio between the CTLA-4-Ig  
 74 group and CTLA-4-Ig + ACTH group. (D) Flow cytometric analysis of spleens collected from  
 75 C57BL/6 recipients at Day 28 showed no difference in the percentages of Tregs, but significantly  
 76 higher Treg/Teff ratio was observed in the CTLA-4-Ig + ACTH group in comparison to CTLA-4-  
 77 Ig group (n=3 mice/group). Data presented as mean  $\pm$  SEM, \* p<0.05, \*\* P<0.01.  
 78

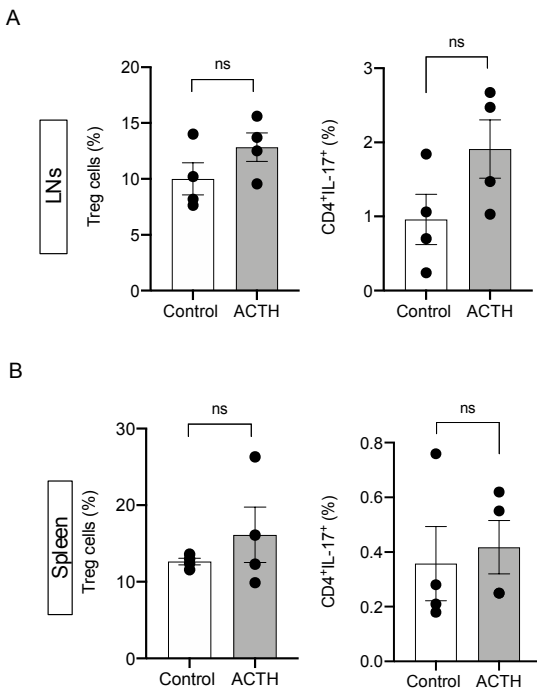

79  
 80 Supplemental Figure 4. (A) Flow cytometric analysis of LNs collected from C57BL/6 recipients  
 81 at 4 weeks shows no significant difference in the percentages of Tregs between ACTH-treated  
 82 group and untreated control group. (B) Flow cytometric analysis of spleens collected from

83 C57BL/6 recipients at 4 weeks shows no significant difference in the percentages of Tregs and  
84 CD4<sup>+</sup>IL-17<sup>+</sup> cells between the ACTH-treated group and the untreated control group. (n=4  
85 mice/group) Data presented as the mean  $\pm$  SEM.
